# Supplementary material for: A deeper insight into the evaluation of water-in-oil amicroemulsion templated samarium sulfide nanospheres: exploring its role in pickering emulsion formulation for photocatalytic dye degradation and synthesis of PANI@Sm2S3 nanocomposites
Source: Royal Society of Chemistry journal article supplement (doi:10.1039/d3na01067h), 2024-01-01
Supplement: d3na01067h1.pdf [file d3na01067h1.pdf]

## **Electronic Supplementary Information (ESI)**

### **A deeper insight into the evaluation of water-in-oil microemulsions templated samarium sulfide nanospheres: explored its role in Pickering emulsion formulation for photocatalytic dye degradation and synthesis of PANI@Sm<sub>2</sub>S<sub>3</sub> nanocomposites**

Sk Meheeb Rahaman<sup>a</sup>, Nargis Khatun<sup>a</sup>, Prashanta Pal<sup>b</sup>, Trishna Mandal<sup>a</sup>, Arnab Patra<sup>a</sup>, Mahasweta Nandi<sup>b</sup>, Bidyut Saha<sup>a\*</sup>

<sup>a</sup>Colloid Chemistry Laboratory, Department of Chemistry, The University of Burdwan, Golapbag, Burdwan-713104, West Bengal, India; [bsaha@chem.buruniv.ac.in](mailto:bsaha@chem.buruniv.ac.in), Tel: +91 9476341691 (B. Saha).

<sup>b</sup>Integrated Science Education and Research Centre, Siksha Bhavana, Visva-Bharati University, Santiniketan-731235, India.

## **Supplementary Material: Tables**

**Table S1.** Average diameter of the Sm<sub>2</sub>S<sub>3</sub> nanospheres (synthesised from W/O microemulsion constituted by Tween 20 and Tween 80) obtained from DLS and TEM analysis.

| Time (min) | Average diameter of nanospheres (nm)<br>Tween 80/1-butanol/toluene/samarium sulfide |       |
|------------|-------------------------------------------------------------------------------------|-------|
|            | DLS                                                                                 | TEM   |
| 5          | 2.0                                                                                 | 3.16  |
| 15         | 3.45                                                                                | 5.37  |
| 30         | 5.89                                                                                | 6.41  |
| 60         | 25.89                                                                               | 34.78 |
| 120        | 44.67                                                                               | 46.31 |

## Supplementary Material: Figures

Fig. S1

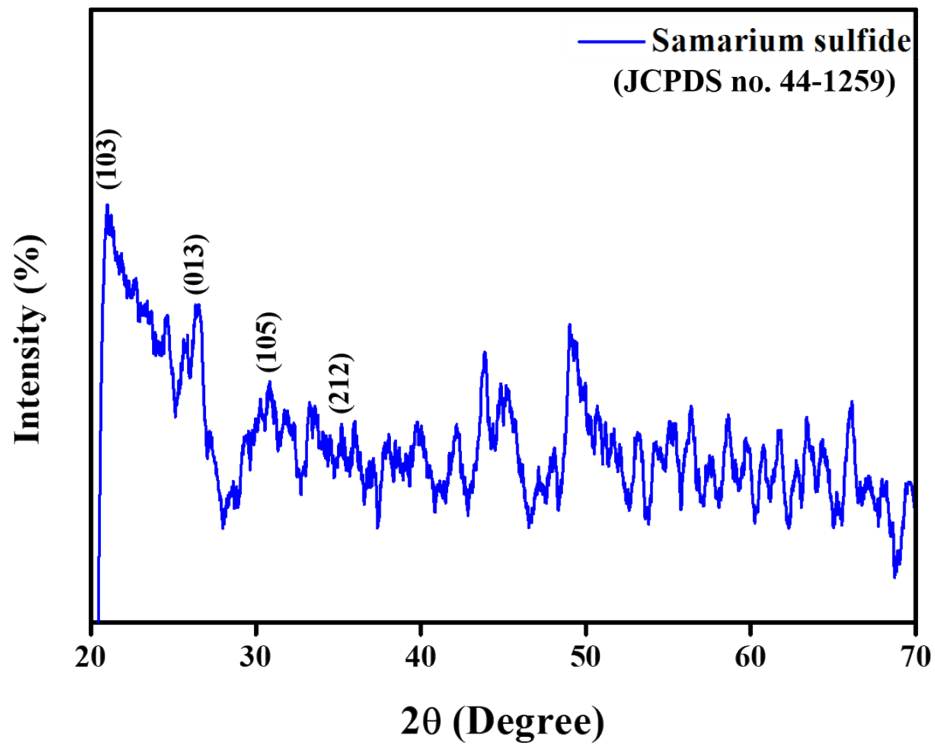

**Fig. S1.** PXRD spectrum of  $\text{Sm}_2\text{S}_3$  nanospheres (synthesised from microemulsion, Tween 80/1-butanol/Toluene/  $\text{Sm}_2\text{S}_3$ ) at room temperature.

Fig. S2

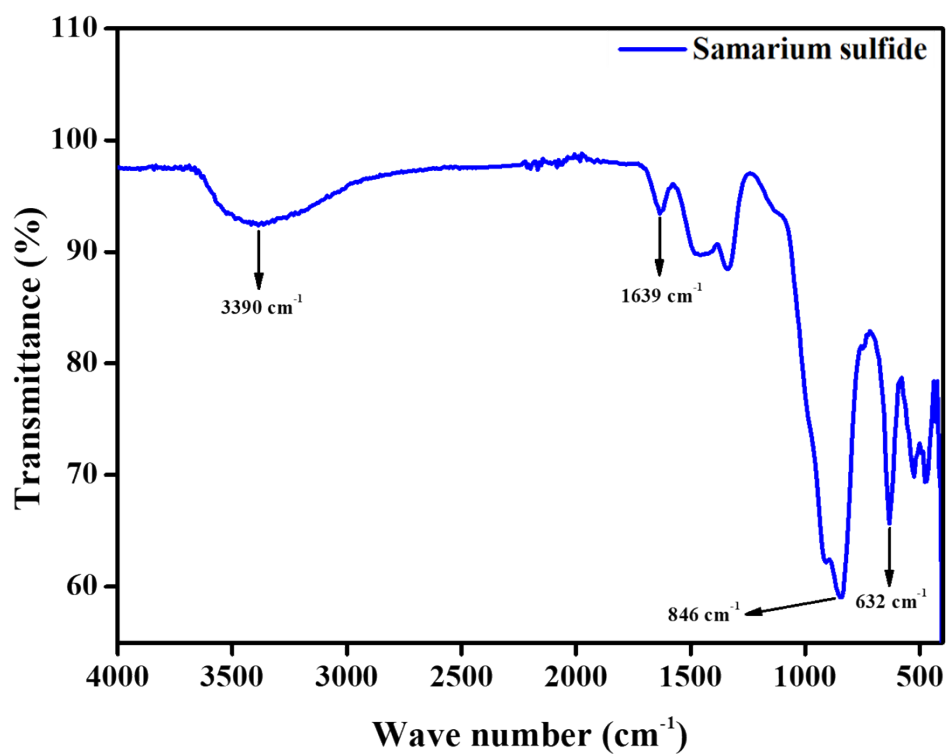

**Fig. S2.** FTIR spectrum of Sm<sub>2</sub>S<sub>3</sub> nanospheres (synthesised from microemulsion, Tween 80/1-butanol/Toluene/ Sm<sub>2</sub>S<sub>3</sub>) at room temperature.

**Fig. S3**

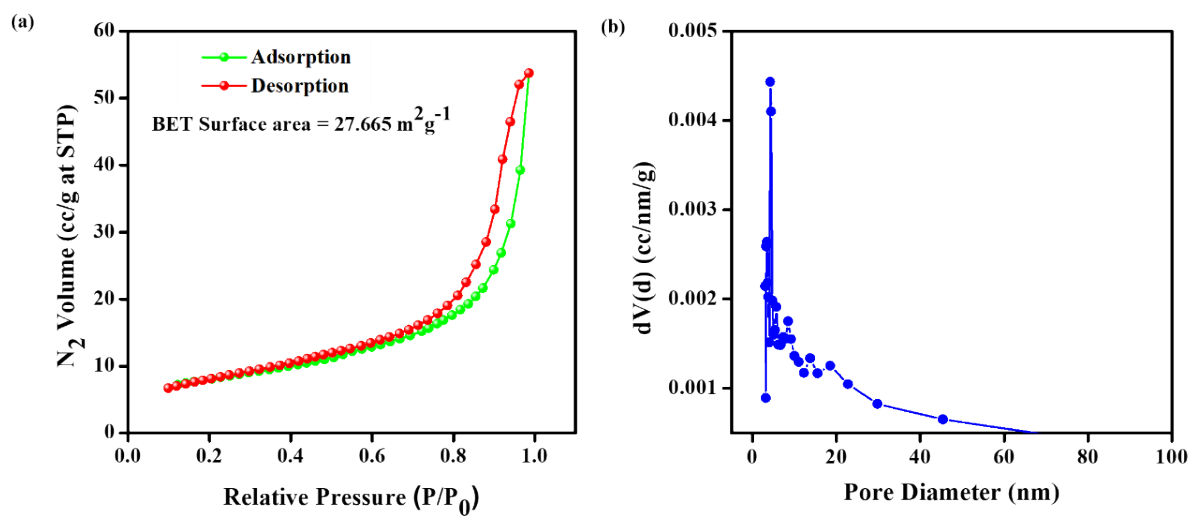

**Fig. S3.** (a) Nitrogen adsorption-desorption isotherm and (b) pore size distribution curve of Sm<sub>2</sub>S<sub>3</sub> nanospheres.

Fig. S4

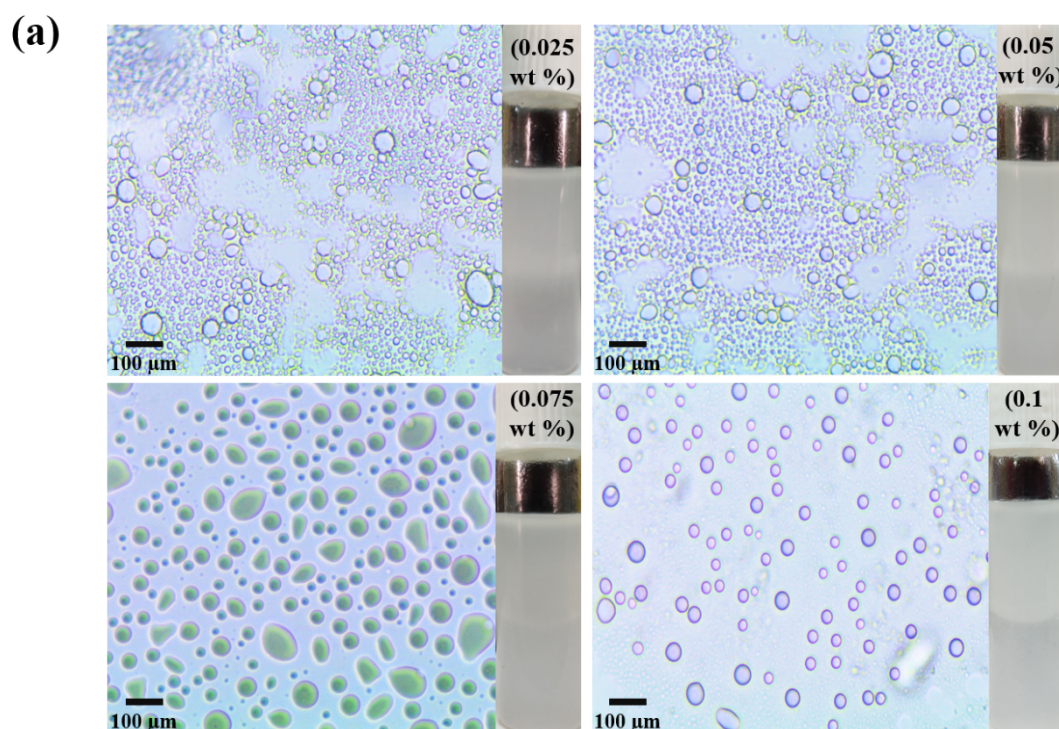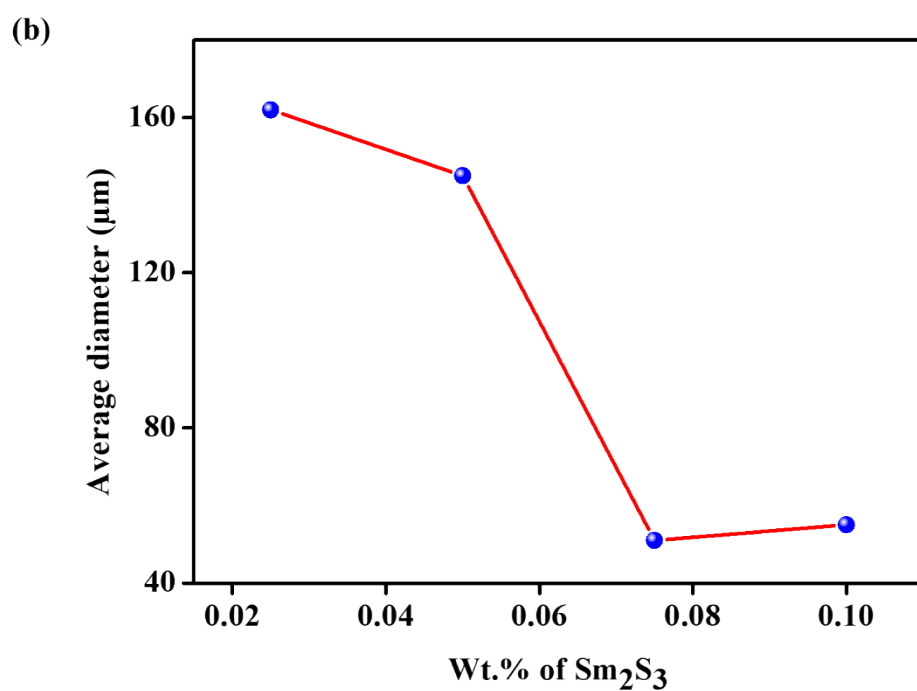

**Fig. S4.** (a) Optical micrographs along with digital images and (b) variation of droplet diameter of Pickering emulsion formed by different wt.%  $\text{Sm}_2\text{S}_3$  nanoparticles, after 1 day of preparation.

**Fig. S5**

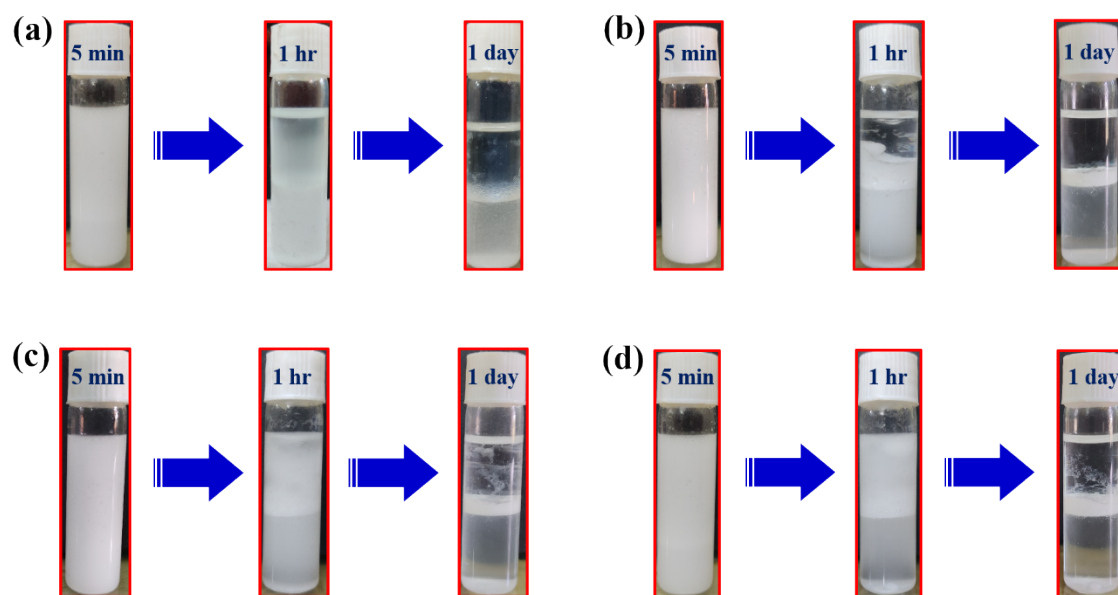

**Fig. S5.** Digital images of Pickering emulsion formed by 0.1 wt.%  $\text{Sm}_2\text{S}_3$  nanoparticles with (a) 0.6 mM, (b) 1.3 mM, (c) 2.0 mM and (d) 2.7 mM CTAB at different time intervals.

Fig. S6

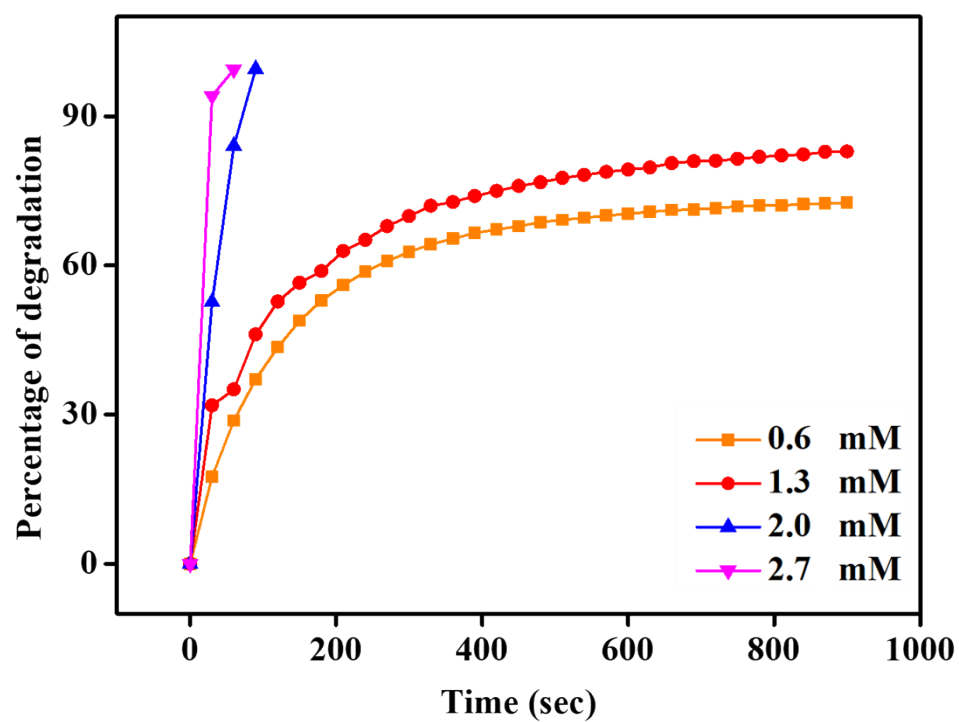

Fig. S6. Photocatalytic degradation of CV dye (having fixed concentration of  $10 \times 10^{-5}$  (M)) after certain time intervals at different CTAB concentration.



**Fig. S7**

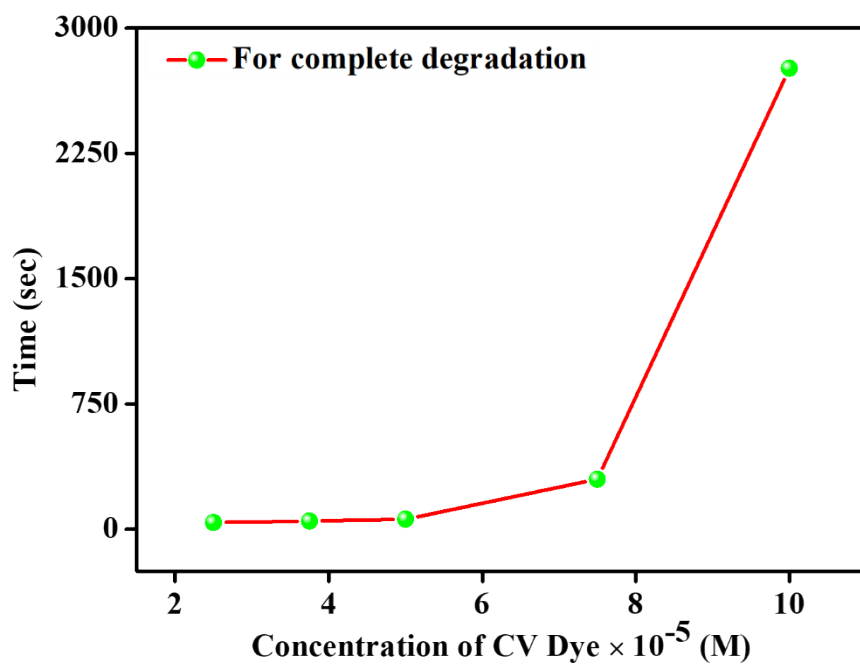

**Fig. S7.** Time required for complete photocatalytic degradation of CV dye at CTAB concentration of 2.7 mM with  $\text{Sm}_2\text{S}_3$  of 0.1 wt.%.

**Fig. S8**

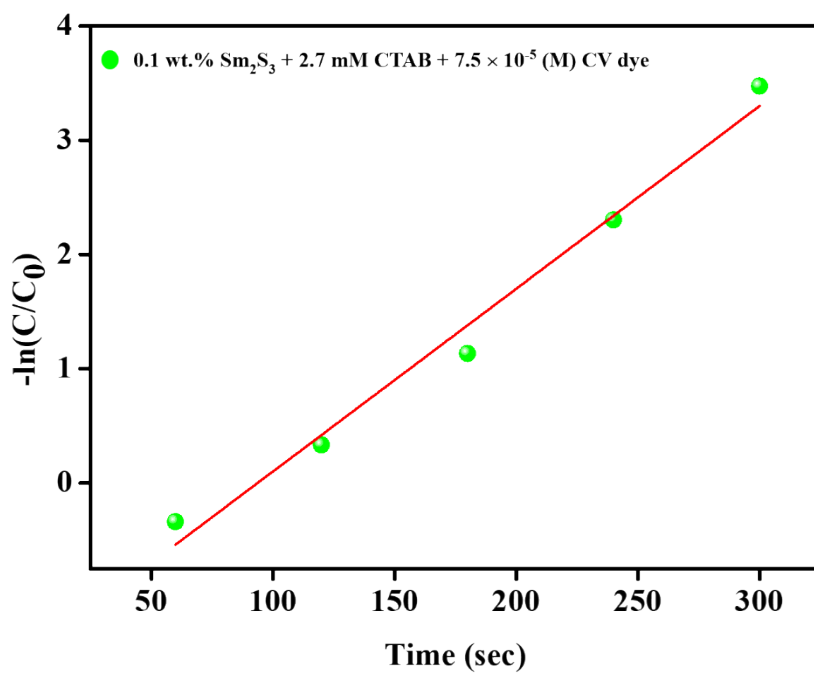

**Fig. S8.** Langmuir-Hinshelwood plot for photocatalytic CV dye degradation in Pickering emulsion prepared by  $\text{Sm}_2\text{S}_3$ , *in situ* hydrophobized with CTAB, followed linear kinetic relationship.
